# Supplementary material for: Daytime-restricted parenteral feeding is associated with earlier oral intake in children following stem cell transplant
Source: JCI journal article supplement (doi:10.1172/jci167275), 2023-02-14
Supplement: sd1 [file 1]

## Supplemental material

**Supplemental Table 1.** Demographics and Bone Marrow Transplant Characteristics

| <b>Characteristic</b>              | <b>Continuous (n=10)</b> | <b>Time-Restricted (n=8)</b> |
|------------------------------------|--------------------------|------------------------------|
| <b>Median Age (range)</b>          | 11.1 (3.2-29.4)          | 8.6 (6.7-15.7)               |
| <b>Female</b>                      | 4                        | 6                            |
| <b>Underlying Diagnosis</b>        |                          |                              |
| Malignancy                         | 6                        | 5                            |
| Primary Immune Deficiency          | 1                        | 0                            |
| Hemoglobinopathy                   | 1                        | 1                            |
| Storage Disorder                   | 1                        | 0                            |
| Bone Marrow Failure                | 1                        | 2                            |
| <b>Allogeneic Transplant</b>       | 8                        | 7                            |
| <b>Stem cell Source</b>            |                          |                              |
| Bone marrow                        | 4                        | 3                            |
| Peripheral blood stem cells        | 4                        | 3                            |
| Umbilical cord blood               | 1                        | 2                            |
| Bone marrow + Umbilical cord blood | 1                        | 0                            |

**Supplemental Table 2.** Demographics and Bone Marrow Transplant Characteristics Stratified by Median TPN Duration of 19 days

| Characteristic                     | Continuous (n=10)  |                   | Time-Restricted (n=8) |                   |
|------------------------------------|--------------------|-------------------|-----------------------|-------------------|
|                                    | TPN<19 days (n=4)  | TPN>19 days (n=6) | TPN<19 days (n=5)     | TPN>19 days (n=3) |
| <b>Median Age (Range)</b>          | 17.4<br>(5.8-29.4) | 8.7<br>(3.2-19.1) | 7.9<br>(6.7-15.7)     | 9.5<br>(8.7-10.6) |
| <b>Female</b>                      | 2 (50%)            | 2 (33%)           | 5 (100%)              | 1 (33%)           |
| <b>Underlying Diagnosis</b>        |                    |                   |                       |                   |
| Malignancy                         | 2 (50%)            | 4 (66%)           | 2 (40%)               | 3 (100%)          |
| Primary Immune Deficiency          | 0                  | 1 (17%)           | 0                     | 0                 |
| Hemoglobinopathy                   | 1 (25%)            | 0                 | 1 (20%)               | 0                 |
| Storage Disorder                   | 0                  | 1 (17%)           | 0                     | 0                 |
| Bone Marrow Failure                | 1 (25%)            | 0                 | 2 (40%)               | 0                 |
| <b>Allogeneic Transplant</b>       | 2 (50%)            | 6 (100%)          | 4 (80%)               | 3 (100%)          |
| <b>Stem cell Source</b>            |                    |                   |                       |                   |
| Bone marrow                        | 0                  | 4 (66%)           | 2 (40%)               | 1 (33%)           |
| Peripheral blood stem cells        | 3 (75%)            | 1 (17%)           | 3 (60%)               | 0                 |
| Umbilical cord blood               | 0                  | 1 (17%)           | 0                     | 2 (67%)           |
| Bone marrow + Umbilical cord blood | 1 (25%)            | 0                 | 0                     | 0                 |

**Supplemental Table 3.** Demographics and Bone Marrow Transplant Characteristics Stratified by Median Admission Length of 44.5 days

| <b>Characteristic</b>              | <b>Continuous (n=10)</b>         |                                  | <b>Time-Restricted (n=8)</b>     |                                  |
|------------------------------------|----------------------------------|----------------------------------|----------------------------------|----------------------------------|
|                                    | Admission<br><44.5<br>days (n=4) | Admission<br>>44.5 days<br>(n=6) | Admission<br><44.5 days<br>(n=5) | Admission<br>>44.5 days<br>(n=3) |
| <b>Median Age (range)</b>          | 9.1<br>(5.5-29.4)                | 14.2<br>(3.2-22.4)               | 7.9<br>(6.7-15.7)                | 8.7<br>(8.5-9.5)                 |
| <b>Female</b>                      | 2 (50%)                          | 2 (33%)                          | 4 (80%)                          | 2 (67%)                          |
| <b>Underlying Diagnosis</b>        |                                  |                                  |                                  |                                  |
| Malignancy                         | 2 (50%)                          | 4 (67%)                          | 3 (60%)                          | 2 (67%)                          |
| Primary Immune Deficiency          | 0                                | 1 (17%)                          | 0                                | 0                                |
| Hemoglobinopathy                   | 1 (25%)                          | 0                                | 0                                | 1 (33%)                          |
| Storage Disorder                   | 0                                | 1 (17%)                          | 0                                | 0                                |
| Bone Marrow Failure                | 1 (25%)                          | 0                                | 2 (40%)                          | 0                                |
| <b>Allogeneic Transplant</b>       | 3 (75%)                          | 5 (83%)                          | 4 (80%)                          | 3 (100%)                         |
| <b>Stem cell Source</b>            |                                  |                                  |                                  |                                  |
| Bone marrow                        | 1 (25%)                          | 3 (50%)                          | 2 (40%)                          | 1 (33%)                          |
| Peripheral blood stem cells        | 2 (50%)                          | 2 (33%)                          | 3 (60%)                          | 0                                |
| Umbilical cord blood               | 0                                | 1 (17%)                          | 0                                | 2 (67%)                          |
| Bone marrow + Umbilical cord blood | 1 (25%)                          | 0                                | 0                                | 0                                |

**Supplemental Figure 1.** CONSORT diagram. Figure created with BioRender.com

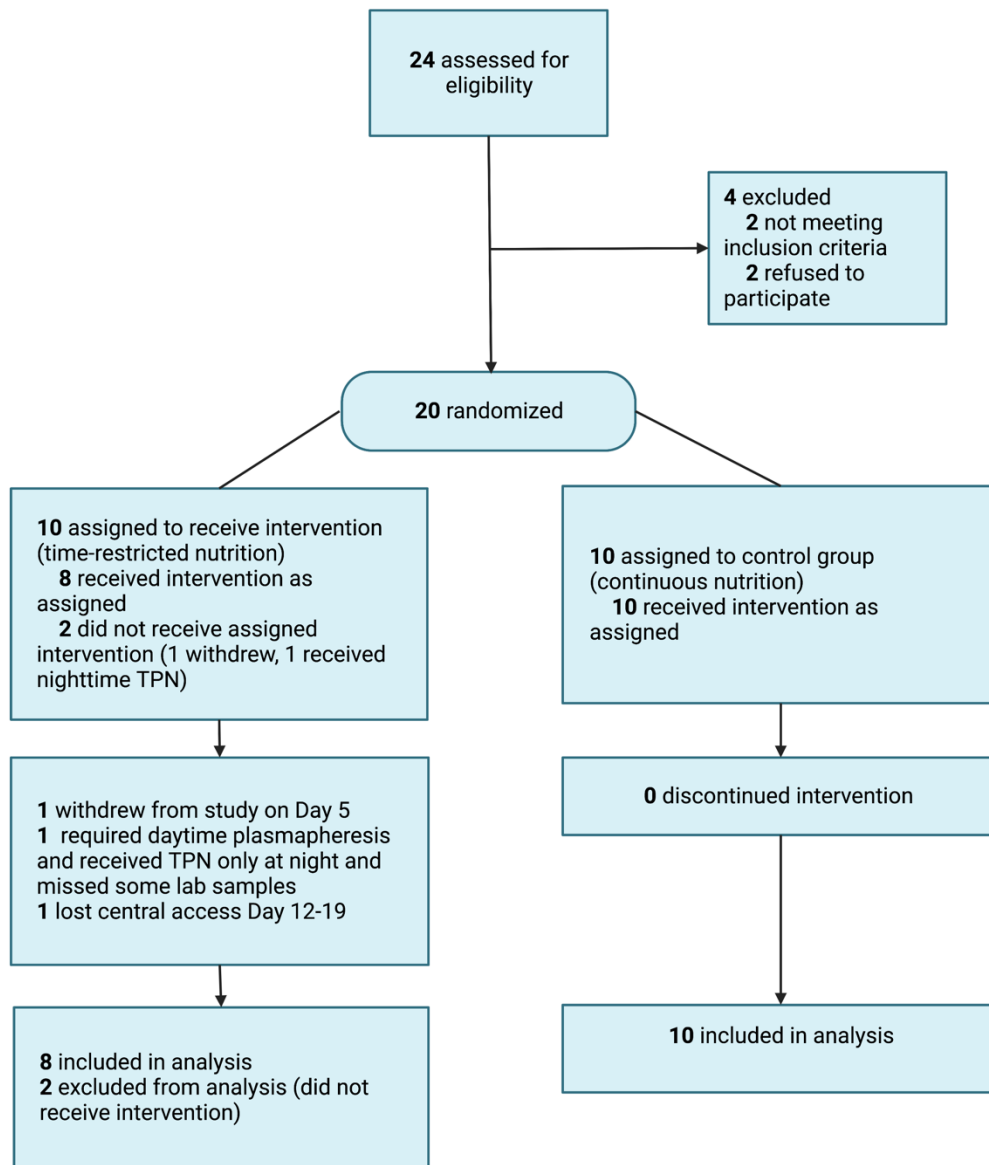

Statistics: The Mann-Whitney U test was used to compare medians across the two groups. F test was used to compare variances across the two groups for TPN duration and admission length. GraphPad Prism9 was used for all calculations.
